# Supplementary material for: Needs management in families affected by childhood-onset dystrophinopathies
Source: PubMed Central journal article supplement — SAGE Open Med. 2019 Mar 2;7:2050312119834470. doi: 10.1177/2050312119834470 (PMC6399767; doi:10.1177/2050312119834470), 2019-03-02
Supplement: SupplementalFile1_Table_1.pdf [file SupplementalFile1_Table_1.pdf]

**Supplemental Table 1. Characteristics of the caregiver, household, affected individual, and source of care provision (n=272).**

| <b>Characteristics</b>                              | <b>Frequency</b> | <b>Percent</b> |
|-----------------------------------------------------|------------------|----------------|
| <b>Caregiver</b>                                    |                  |                |
| <b>Marital Status</b>                               |                  |                |
| Single, never married                               | 16               | 5.93           |
| Married or living as married                        | 212              | 78.52          |
| Widowed                                             | 3                | 1.11           |
| Separated                                           | 10               | 3.7            |
| Divorced                                            | 29               | 10.74          |
| <b>Education</b>                                    |                  |                |
| Grade school                                        | 4                | 1.48           |
| Junior high                                         | 5                | 1.85           |
| High school, no diploma                             | 14               | 5.19           |
| High school with diploma                            | 50               | 18.52          |
| Some college, no diploma                            | 63               | 23.33          |
| Technical college or associate degree               | 52               | 19.26          |
| Bachelor's degree                                   | 48               | 17.78          |
| Graduate or professional degree                     | 34               | 12.59          |
| <b>Household</b>                                    |                  |                |
| <b>Income</b>                                       |                  |                |
| <\$10,000                                           | 21               | 8.43           |
| \$10,000-\$19,999                                   | 22               | 8.84           |
| \$20,000-\$29,999                                   | 37               | 14.86          |
| \$30,000-\$39,999                                   | 19               | 7.63           |
| \$40,000-\$49,999                                   | 20               | 8.03           |
| \$50,000-\$59,999                                   | 18               | 7.23           |
| \$60,000-\$69,999                                   | 21               | 8.43           |
| \$70,000-\$79,999                                   | 22               | 8.84           |
| \$80,000-\$89,999                                   | 14               | 5.62           |
| \$90,000-\$99,999                                   | 14               | 5.62           |
| >\$100,000                                          | 41               | 16.47          |
| <b>Other persons in household with disabilities</b> |                  |                |
| No                                                  | 226              | 84.33          |
| Yes                                                 | 42               | 15.67          |
| <b>Characteristics Individual with DBMD</b>         |                  |                |
| <b>Living Situation</b>                             |                  |                |
| Both parents, same household                        | 194              | 71.32          |
| Foster home                                         | 0                | 0              |
| Group home                                          | 1                | 0.37           |
| Independently                                       | 6                | 2.21           |
| One parent                                          | 50               | 18.38          |
| Two parents, different households                   | 12               | 4.41           |
| Relative                                            | 3                | 1.1            |
| Spouse                                              | 2                | 0.74           |
| Other                                               | 15               | 5.51           |

| <b>Characteristics</b>                                                               | <b>Frequency</b> | <b>Percent</b> |
|--------------------------------------------------------------------------------------|------------------|----------------|
| <b>Current ambulation</b>                                                            |                  |                |
| Walking without help                                                                 | 93               | 34.32          |
| Walking with help                                                                    | 22               | 8.12           |
| Manual wheelchair, full-time                                                         | 8                | 2.95           |
| Power scooter, full-time                                                             | 4                | 1.48           |
| Power wheelchair, full-time                                                          | 132              | 48.71          |
| Cannot operate power mobility                                                        | 7                | 2.58           |
| <b>Current respiratory function</b>                                                  |                  |                |
| No assistance                                                                        | 194              | 71.32          |
| Bi-pap or c-pap with sleep                                                           | 37               | 13.6           |
| Daytime bi-pap or c-pap                                                              | 5                | 1.84           |
| Bi-pap or c-pap with sleep and sip-n-puff mouthpiece, breath-stacking during the day | 3                | 1.1            |
| Tracheostomy with part-time ventilation                                              | 7                | 2.57           |
| Trachesotomy with full-time ventilation                                              | 10               | 3.68           |
| <b>Provision of Care</b>                                                             |                  |                |
| <b>Caregiver</b>                                                                     |                  |                |
| No                                                                                   | 24               | 8.92           |
| Yes                                                                                  | 242              | 91.18          |
| <b>Other provide</b>                                                                 |                  |                |
| No                                                                                   | 80               | 30.08          |
| Yes                                                                                  | 180              | 69.82          |

Totals may not add up to total sample due to missing values.
