# Supplementary material for: Needs management in families affected by childhood-onset dystrophinopathies
Source: PubMed Central journal article supplement — SAGE Open Med. 2019 Mar 2;7:2050312119834470. doi: 10.1177/2050312119834470 (PMC6399767; doi:10.1177/2050312119834470), 2019-03-02
Supplement: SupplementaryFile2_Needs_Frequencies.pdf [file SupplementaryFile2_Needs_Frequencies.pdf]

**Supplementary Table S2. Frequency distributions and chi-square tests for needs by ambulation status, household income and race/ethnicity.**

| Need Domains                                                                                                                              | Overall Needed<br>(n=272) |      | Ambulation Status         |      |                       |      | Household Income  |      |                    |      | Race/Ethnicity     |      |                         |      |
|-------------------------------------------------------------------------------------------------------------------------------------------|---------------------------|------|---------------------------|------|-----------------------|------|-------------------|------|--------------------|------|--------------------|------|-------------------------|------|
|                                                                                                                                           |                           |      | Non-Ambulatory<br>(n=151) |      | Ambulatory<br>(n=115) |      | <30,000<br>(n=80) |      | ≥30,000<br>(n=169) |      | Minority<br>(n=59) |      | Non-Minority<br>(n=209) |      |
|                                                                                                                                           | n                         | %    | n                         | %    | n                     | %    | n                 | %    | n                  | %    | n                  | %    | n                       | %    |
| <b>Home, Community, and Equipment</b>                                                                                                     |                           |      |                           |      |                       |      |                   |      |                    |      |                    |      |                         |      |
| 1. Identifying appropriate home modifications (knowing what to do) <sup>a</sup>                                                           | 212                       | 78.5 | 143                       | 94.7 | 63                    | 55.8 | 65                | 82.3 | 132                | 78.6 | 48                 | 82.8 | 162                     | 77.9 |
| 2. Finding funding for home modifications <sup>a</sup>                                                                                    | 192                       | 71.1 | 137                       | 90.7 | 50                    | 43.9 | 62                | 78.5 | 116                | 68.6 | 45                 | 76.3 | 147                     | 70.7 |
| 3. Finding a builder/contractor for home modifications <sup>a</sup>                                                                       | 163                       | 61.7 | 120                       | 82.2 | 39                    | 34.5 | 48                | 61.5 | 103                | 62.8 | 38                 | 65.5 | 125                     | 61.6 |
| 4. Finding funding for vehicle modifications <sup>a</sup>                                                                                 | 177                       | 65.6 | 135                       | 89.4 | 36                    | 31.9 | 58                | 73.4 | 103                | 61.0 | 43                 | 74.1 | 132                     | 63.5 |
| 5. Finding accessible public transportation services (buses, rides) <sup>a,c</sup>                                                        | 128                       | 47.8 | 94                        | 63.1 | 30                    | 26.6 | 42                | 53.9 | 73                 | 43.7 | 40                 | 69.0 | 86                      | 41.8 |
| 6. Completing personal care activities (bathing, lifting, toileting) <sup>a,b,c</sup>                                                     | 204                       | 75.8 | 147                       | 98.0 | 51                    | 45.1 | 65                | 84.4 | 119                | 70.4 | 51                 | 86.4 | 151                     | 73.3 |
| 7. Finding funding for personal care activities (bathing, lifting, toileting) <sup>a,b,c</sup>                                            | 173                       | 64.3 | 132                       | 88.0 | 35                    | 31.0 | 59                | 75.6 | 99                 | 58.9 | 47                 | 79.7 | 124                     | 60.2 |
| 8. Finding care assistance at home (aides, visiting nurses, attendants, etc.) <sup>a,b,c</sup>                                            | 155                       | 57.2 | 124                       | 82.1 | 26                    | 22.8 | 52                | 65.8 | 88                 | 52.1 | 44                 | 74.6 | 109                     | 52.4 |
| 9. Identifying appropriate adaptive equipment for walking, standing or mobility <sup>a</sup>                                              | 195                       | 72.8 | 134                       | 90.5 | 56                    | 49.1 | 63                | 80.8 | 115                | 68.9 | 43                 | 74.1 | 150                     | 72.8 |
| 10. Getting funding/insurance to pay for equipment <sup>a</sup>                                                                           | 209                       | 77.7 | 143                       | 96.0 | 60                    | 52.6 | 66                | 83.5 | 126                | 75.5 | 46                 | 79.3 | 161                     | 77.8 |
| 11. Finding equipment vendors in your community <sup>a</sup>                                                                              | 203                       | 75.2 | 140                       | 93.3 | 57                    | 50.0 | 59                | 74.7 | 127                | 75.6 | 43                 | 74.1 | 158                     | 76.0 |
| 12. Getting leg braces to fit well & work for your needs                                                                                  | 130                       | 48.2 | 72                        | 48.0 | 54                    | 47.4 | 40                | 50.6 | 81                 | 48.2 | 26                 | 44.8 | 102                     | 49.0 |
| 13. Identifying appropriate classroom/job equipment (assistive technology) <sup>a</sup>                                                   | 175                       | 65.3 | 123                       | 82.6 | 47                    | 41.6 | 52                | 67.5 | 110                | 65.5 | 39                 | 66.1 | 134                     | 65.4 |
| <b>Help managing healthcare problems</b>                                                                                                  |                           |      |                           |      |                       |      |                   |      |                    |      |                    |      |                         |      |
| 14. Joint contractures & muscle weakness <sup>a</sup>                                                                                     | 229                       | 85.8 | 139                       | 93.9 | 85                    | 74.6 | 71                | 91.0 | 140                | 83.8 | 51                 | 87.9 | 177                     | 85.9 |
| 15. Problems with breathing, respiratory illnesses <sup>a,b</sup>                                                                         | 128                       | 47.8 | 95                        | 63.3 | 29                    | 25.4 | 44                | 57.1 | 72                 | 42.6 | 33                 | 56.9 | 95                      | 45.9 |
| 16. Heart problems <sup>a</sup>                                                                                                           | 131                       | 49.1 | 91                        | 61.5 | 38                    | 33.3 | 38                | 48.7 | 83                 | 49.7 | 33                 | 57.9 | 97                      | 46.9 |
| 17. Circulation difficulties & swelling in the feet <sup>a</sup>                                                                          | 92                        | 34.2 | 75                        | 50.0 | 16                    | 14.0 | 25                | 32.1 | 59                 | 34.9 | 26                 | 44.8 | 65                      | 31.3 |
| 18. Bowel & bladder function <sup>a</sup>                                                                                                 | 140                       | 52.2 | 102                       | 68.5 | 33                    | 29.0 | 47                | 60.3 | 81                 | 48.2 | 33                 | 57.9 | 107                     | 51.4 |
| 19. Diet & nutrition information <sup>a,b</sup>                                                                                           | 193                       | 71.8 | 122                       | 81.3 | 65                    | 57.5 | 65                | 82.3 | 111                | 66.5 | 47                 | 81.0 | 143                     | 69.1 |
| 20. Comfort & pain control <sup>a,b</sup>                                                                                                 | 175                       | 65.5 | 121                       | 81.8 | 48                    | 42.5 | 62                | 79.5 | 96                 | 57.8 | 42                 | 75.0 | 131                     | 63.3 |
| 21. Issues relating to sexuality (as age appropriate) <sup>a</sup>                                                                        | 110                       | 41.0 | 81                        | 54.4 | 25                    | 21.9 | 26                | 33.3 | 75                 | 44.6 | 26                 | 45.6 | 84                      | 40.4 |
| 22. Testing for learning disabilities                                                                                                     | 155                       | 57.6 | 83                        | 55.7 | 66                    | 57.9 | 48                | 61.5 | 95                 | 56.6 | 33                 | 57.9 | 120                     | 57.7 |
| 23. Dental care <sup>a</sup>                                                                                                              | 231                       | 85.6 | 146                       | 97.3 | 79                    | 69.3 | 72                | 91.1 | 141                | 83.9 | 53                 | 91.4 | 176                     | 84.6 |
| <b>Information</b>                                                                                                                        |                           |      |                           |      |                       |      |                   |      |                    |      |                    |      |                         |      |
| 24. Information about inheritance and carrier testing <sup>c</sup>                                                                        | 230                       | 85.2 | 127                       | 84.1 | 98                    | 86.7 | 66                | 82.5 | 145                | 86.3 | 42                 | 73.7 | 185                     | 88.5 |
| 25. Information about prenatal testing for DBMD                                                                                           | 132                       | 49.1 | 77                        | 51.3 | 51                    | 45.1 | 36                | 45.6 | 84                 | 50.0 | 30                 | 51.7 | 100                     | 48.3 |
| 26. Information about the course of the disease <sup>c</sup>                                                                              | 256                       | 95.5 | 143                       | 96.6 | 107                   | 93.9 | 74                | 93.7 | 161                | 96.4 | 51                 | 91.1 | 203                     | 97.6 |
| 27. Information for talking to family/friends about health concerns related to MD                                                         | 250                       | 92.6 | 140                       | 92.7 | 106                   | 93.0 | 71                | 88.8 | 160                | 95.2 | 52                 | 91.2 | 196                     | 93.8 |
| 28. Information on MDA, PPMD or similar organizations                                                                                     | 259                       | 96.3 | 145                       | 96.7 | 108                   | 95.6 | 75                | 94.9 | 163                | 97.0 | 55                 | 94.8 | 202                     | 97.6 |
| 29. Information about financial resources (private, state, federal, etc.) <sup>a,c</sup>                                                  | 255                       | 94.1 | 146                       | 96.7 | 103                   | 90.4 | 75                | 93.8 | 160                | 94.7 | 52                 | 89.7 | 201                     | 96.2 |
| 30. Access to research updates <sup>c</sup>                                                                                               | 259                       | 95.9 | 144                       | 95.4 | 110                   | 96.5 | 75                | 93.8 | 164                | 97.0 | 53                 | 91.4 | 204                     | 97.6 |
| 31. Access to research participation <sup>c</sup>                                                                                         | 255                       | 95.2 | 144                       | 96.0 | 106                   | 93.8 | 73                | 91.3 | 161                | 96.4 | 52                 | 91.2 | 201                     | 96.6 |
| 32. Information about jobs/future planning for the male with DBMD <sup>a</sup>                                                            | 195                       | 72.2 | 122                       | 81.3 | 68                    | 59.7 | 54                | 67.5 | 124                | 73.8 | 42                 | 72.4 | 151                     | 72.6 |
| 33. Information about transitioning to independent adult life <sup>a</sup>                                                                | 169                       | 64.0 | 112                       | 76.2 | 54                    | 48.2 | 47                | 60.3 | 108                | 65.1 | 40                 | 70.2 | 128                     | 62.8 |
| 34. Information about how to prepare advance directives: living wills & designating durable power of attorney for healthcare <sup>a</sup> | 205                       | 76.2 | 134                       | 89.3 | 67                    | 58.8 | 61                | 77.2 | 127                | 75.2 | 43                 | 75.4 | 161                     | 77.0 |
| <b>Psychosocial Issues for Patient with DBMD</b>                                                                                          |                           |      |                           |      |                       |      |                   |      |                    |      |                    |      |                         |      |
| 35. Advocating at the school or the workplace                                                                                             | 212                       | 79.4 | 116                       | 77.9 | 91                    | 81.3 | 61                | 78.2 | 135                | 80.8 | 41                 | 71.9 | 170                     | 82.5 |
| 36. Patient discussion/support groups                                                                                                     | 214                       | 79.6 | 121                       | 80.7 | 87                    | 77.0 | 63                | 79.8 | 134                | 79.8 | 44                 | 77.2 | 168                     | 80.8 |

**Supplementary Table S2. Frequency distributions and chi-square tests for needs by ambulation status, household income and race/ethnicity.**

|                                                                                             |     |      |            |             |           |             |           |             |            |             |    |      |     |      |
|---------------------------------------------------------------------------------------------|-----|------|------------|-------------|-----------|-------------|-----------|-------------|------------|-------------|----|------|-----|------|
| 37. Counseling to help emotional adjustment (depression, fear, loneliness)                  | 201 | 75.3 | 115        | 77.2        | 81        | 72.3        | 54        | 69.2        | 129        | 77.3        | 40 | 71.4 | 159 | 76.8 |
| 38. Making & maintaining age-appropriate friendships <sup>a</sup>                           | 233 | 88.3 | <b>140</b> | <b>94.6</b> | <b>90</b> | <b>79.7</b> | 66        | 84.6        | 148        | 89.7        | 50 | 87.7 | 182 | 89.2 |
| 39. Suggestions for recreational activities alone or with family and friends <sup>a</sup>   | 235 | 88.4 | <b>138</b> | <b>93.2</b> | <b>91</b> | <b>81.3</b> | 69        | 89.6        | 147        | 88.0        | 50 | 89.3 | 183 | 88.8 |
| <b>Psychosocial Issues for Parent/Caregivers &amp; Family</b>                               |     |      |            |             |           |             |           |             |            |             |    |      |     |      |
| 40. Balancing work, family & caregiving <sup>a</sup>                                        | 245 | 91.1 | <b>145</b> | <b>96.0</b> | <b>94</b> | <b>83.9</b> | 70        | 88.6        | 155        | 92.3        | 53 | 91.4 | 190 | 91.8 |
| 41. Finding time and energy for yourself (personal time for the caregiver) <sup>a</sup>     | 241 | 89.9 | <b>143</b> | <b>95.3</b> | <b>92</b> | <b>82.1</b> | 68        | 86.1        | 153        | 91.6        | 51 | 87.9 | 188 | 91.3 |
| 42. Finding time and energy for adult relationships (spouse/significant other) <sup>a</sup> | 238 | 88.8 | <b>140</b> | <b>93.3</b> | <b>92</b> | <b>82.1</b> | 66        | 83.5        | 152        | 91.0        | 48 | 84.2 | 188 | 90.8 |
| 43. Arranging child care for a child with disability (for parents to work) <sup>a</sup>     | 164 | 61.7 | <b>103</b> | <b>69.1</b> | <b>56</b> | <b>50.5</b> | 50        | 63.3        | 103        | 62.4        | 39 | 67.2 | 123 | 60.3 |
| 44. Finding funding and available respite care so caregivers can be gone <sup>a</sup>       | 190 | 70.9 | <b>130</b> | <b>86.7</b> | <b>55</b> | <b>49.1</b> | 56        | 70.9        | 119        | 71.3        | 46 | 79.3 | 142 | 68.9 |
| 45. Finding or attending parent, spouse or sibling support groups <sup>b</sup>              | 205 | 76.8 | 121        | 80.1        | 78        | 70.9        | <b>53</b> | <b>68.0</b> | <b>133</b> | <b>79.6</b> | 46 | 79.3 | 157 | 76.6 |
| 46. Arranging or getting access to marriage or relationship counseling                      | 124 | 46.3 | 75         | 50.0        | 45        | 40.2        | 35        | 44.3        | 78         | 46.7        | 27 | 46.6 | 96  | 46.6 |
| 47. Counseling to help emotional adjustment (depression, fear, loneliness) <sup>a</sup>     | 177 | 66.0 | <b>108</b> | <b>71.5</b> | <b>66</b> | <b>58.9</b> | 51        | 64.6        | 112        | 66.7        | 36 | 62.1 | 140 | 67.6 |
| 48. Finding appropriate discipline techniques for the child with DBMD                       | 176 | 65.7 | 91         | 60.3        | 80        | 71.4        | 50        | 63.3        | 115        | 68.5        | 37 | 63.8 | 139 | 67.2 |

Hawaii excluded. Bolded numbers are significantly different.

<sup>a</sup>Chi-square for ambulation status statistically significant ( $p < .05$ ). <sup>b</sup>Chi-square for household income statistically significant ( $p < .05$ ). <sup>c</sup>Chi-square for race/ethnicity statistically significant ( $p < .05$ ).
