# Supplementary material for: Needs management in families affected by childhood-onset dystrophinopathies
Source: PubMed Central journal article supplement — SAGE Open Med. 2019 Mar 2;7:2050312119834470. doi: 10.1177/2050312119834470 (PMC6399767; doi:10.1177/2050312119834470), 2019-03-02
Supplement: SupplementaryFile3_Managed_Frequencies.pdf [file SupplementaryFile3_Managed_Frequencies.pdf]

**Supplementary Table S3. Frequency distributions and chi-square tests for management of needs by ambulation status, household income and race/ethnicity.**

| Question                                                                                                                     | Overall Managed*<br>(n=272) |      | Ambulation Status <sup>a</sup> |              |                       |             | Household Income <sup>b</sup> |             |                    |             | Race/Ethnicity <sup>c</sup> |             |                         |             |
|------------------------------------------------------------------------------------------------------------------------------|-----------------------------|------|--------------------------------|--------------|-----------------------|-------------|-------------------------------|-------------|--------------------|-------------|-----------------------------|-------------|-------------------------|-------------|
|                                                                                                                              |                             |      | non-ambulatory<br>(n=151)      |              | ambulatory<br>(n=115) |             | <30,000<br>(n=80)             |             | ≥30,000<br>(n=169) |             | minority<br>(n=59)          |             | non-minority<br>(n=209) |             |
|                                                                                                                              | n                           | %    | n                              | %            | n                     | %           | n                             | %           | n                  | %           | n                           | %           | n                       | %           |
| <b>Home, Community, and Equipment</b>                                                                                        |                             |      |                                |              |                       |             |                               |             |                    |             |                             |             |                         |             |
| 1. Identifying appropriate home modifications (knowing what to do) <sup>b,c</sup>                                            | 159                         | 75.0 | 110                            | 76.9         | 44                    | 69.8        | <b>42</b>                     | <b>64.6</b> | <b>107</b>         | <b>81.1</b> | <b>29</b>                   | <b>60.4</b> | <b>128</b>              | <b>79.0</b> |
| 2. Finding funding for home modifications <sup>b</sup>                                                                       | 85                          | 44.3 | 61                             | 44.5         | 21                    | 42.0        | <b>21</b>                     | <b>33.9</b> | <b>60</b>          | <b>51.7</b> | 17                          | 37.8        | 68                      | 46.3        |
| 3. Finding a builder/contractor for home modifications <sup>b</sup>                                                          | 82                          | 50.3 | 62                             | 51.7         | 17                    | 43.6        | <b>18</b>                     | <b>37.5</b> | <b>61</b>          | <b>59.2</b> | 14                          | 36.8        | 68                      | 54.4        |
| 4. Finding funding for vehicle modifications <sup>a,b,c</sup>                                                                | 66                          | 37.3 | <b>58</b>                      | <b>43.0</b>  | <b>6</b>              | <b>16.7</b> | <b>16</b>                     | <b>27.6</b> | <b>45</b>          | <b>43.7</b> | <b>9</b>                    | <b>20.9</b> | <b>56</b>               | <b>42.4</b> |
| 5. Finding accessible public transportation services (buses, rides, etc.)                                                    | 71                          | 55.5 | 51                             | 54.3         | 19                    | 63.3        | 21                            | 50.0        | 42                 | 57.5        | 24                          | 60.0        | 45                      | 52.3        |
| 6. Completing personal care activities (bathing, lifting, toileting, etc.)                                                   | 187                         | 91.7 | 136                            | 92.5         | 45                    | 88.2        | 57                            | 87.7        | 112                | 94.1        | 46                          | 90.2        | 139                     | 92.1        |
| 7. Finding funding for personal care activities (bathing, lifting, toileting, etc.)                                          | 126                         | 72.8 | 98                             | 74.2         | 25                    | 71.4        | 43                            | 72.9        | 71                 | 71.7        | 38                          | 80.9        | 87                      | 70.2        |
| 8. Finding care assistance at home (aides, visiting nurses, attendants, etc.)                                                | 103                         | 66.5 | 83                             | 66.9         | 17                    | 65.4        | 33                            | 63.5        | 60                 | 68.2        | 32                          | 72.7        | 71                      | 65.1        |
| 9. Identifying appropriate adaptive equipment for walking, standing or mobility <sup>a</sup>                                 | 171                         | 87.7 | <b>123</b>                     | <b>91.8</b>  | <b>43</b>             | <b>76.8</b> | 55                            | 87.3        | 102                | 88.7        | 39                          | 90.7        | 130                     | 86.7        |
| 10. Getting funding/insurance to pay for equipment <sup>a</sup>                                                              | 175                         | 83.7 | <b>127</b>                     | <b>88.8</b>  | <b>42</b>             | <b>70.0</b> | 51                            | 77.3        | 107                | 84.9        | 38                          | 82.6        | 135                     | 83.9        |
| 11. Finding equipment vendors in your community                                                                              | 164                         | 80.8 | 116                            | 82.9         | 42                    | 73.7        | 45                            | 76.3        | 105                | 82.7        | 35                          | 81.4        | 127                     | 80.4        |
| 12. Getting leg braces to fit well & work for your needs <sup>a</sup>                                                        | 114                         | 87.7 | <b>59</b>                      | <b>81.9</b>  | <b>41</b>             | <b>94.4</b> | 36                            | 90.0        | 69                 | 85.2        | 23                          | 88.5        | 89                      | 87.3        |
| 13. Identifying appropriate classroom/job equipment (assistive technology)                                                   | 136                         | 77.7 | 90                             | 73.2         | 41                    | 87.2        | 40                            | 76.9        | 86                 | 78.2        | 30                          | 76.9        | 105                     | 78.4        |
| <b>Help managing healthcare problems</b>                                                                                     |                             |      |                                |              |                       |             |                               |             |                    |             |                             |             |                         |             |
| 14. Joint contractures & muscle weakness <sup>a</sup>                                                                        | 184                         | 80.4 | <b>104</b>                     | <b>74.78</b> | <b>76</b>             | <b>89.4</b> | 54                            | 76.1        | 118                | 84.3        | 38                          | 74.5        | 146                     | 82.5        |
| 15. Problems with breathing, respiratory illnesses <sup>a</sup>                                                              | 113                         | 88.3 | <b>88</b>                      | <b>92.6</b>  | <b>22</b>             | <b>75.9</b> | 38                            | 86.4        | 65                 | 90.3        | 26                          | 78.8        | 87                      | 91.6        |
| 16. Heart problems <sup>a</sup>                                                                                              | 124                         | 94.7 | <b>89</b>                      | <b>97.8</b>  | <b>33</b>             | <b>86.8</b> | 34                            | 89.5        | 80                 | 96.4        | 29                          | 87.9        | 94                      | 96.9        |
| 17. Circulation difficulties & swelling in the feet                                                                          | 65                          | 70.7 | 54                             | 72.0         | 11                    | 68.8        | 16                            | 64.0        | 42                 | 71.2        | 18                          | 69.2        | 46                      | 70.8        |
| 18. Bowel & bladder function                                                                                                 | 116                         | 82.9 | 87                             | 85.3         | 26                    | 78.8        | 36                            | 76.6        | 69                 | 85.2        | 25                          | 75.8        | 91                      | 85.1        |
| 19. Diet & nutrition information                                                                                             | 165                         | 85.5 | 103                            | 84.4         | 57                    | 87.7        | 56                            | 86.2        | 93                 | 83.8        | 38                          | 80.9        | 124                     | 86.7        |
| 20. Comfort & pain control                                                                                                   | 140                         | 80.0 | 96                             | 79.3         | 39                    | 81.3        | 45                            | 72.6        | 80                 | 83.3        | 30                          | 71.4        | 108                     | 82.4        |
| 21. Issues relating to sexuality (as age appropriate)                                                                        | 72                          | 65.5 | 52                             | 64.2         | 17                    | 68.0        | 17                            | 65.4        | 48                 | 64.0        | 14                          | 53.9        | 58                      | 69.1        |
| 22. Testing for learning disabilities <sup>c</sup>                                                                           | 140                         | 90.3 | 73                             | 88.0         | 62                    | 93.9        | 43                            | 89.6        | 87                 | 91.6        | <b>26</b>                   | <b>78.8</b> | <b>112</b>              | <b>93.3</b> |
| 23. Dental care                                                                                                              | 201                         | 87.0 | 123                            | 84.3         | 72                    | 91.1        | 59                            | 81.9        | 126                | 89.4        | 44                          | 83.0        | 156                     | 88.6        |
| <b>Information</b>                                                                                                           |                             |      |                                |              |                       |             |                               |             |                    |             |                             |             |                         |             |
| 24. Information about inheritance and carrier testing                                                                        | 184                         | 80.0 | 105                            | 82.7         | 76                    | 77.6        | 49                            | 74.2        | 121                | 83.5        | 31                          | 73.8        | 151                     | 81.6        |
| 25. Information about prenatal testing for DBMD                                                                              | 89                          | 67.4 | 54                             | 70.1         | 34                    | 66.7        | 26                            | 72.2        | 59                 | 70.2        | 23                          | 76.7        | 65                      | 65.0        |
| 26. Information about the course of the disease                                                                              | 228                         | 89.1 | 128                            | 89.5         | 94                    | 87.9        | 64                            | 86.5        | 147                | 91.3        | 46                          | 90.2        | 180                     | 88.7        |
| 27. Information for talking to family/friends about health concerns related to muscular dystrophy                            | 200                         | 80.0 | 109                            | 77.9         | 88                    | 83.0        | 53                            | 74.7        | 133                | 83.1        | 39                          | 75.0        | 159                     | 81.1        |
| 28. Information on MDA, PPMD or similar organizations <sup>a</sup>                                                           | 233                         | 90.0 | <b>126</b>                     | <b>86.9</b>  | <b>102</b>            | <b>94.4</b> | 65                            | 86.7        | 150                | 92.0        | 47                          | 85.5        | 184                     | 91.1        |
| 29. Information about financial resources (private, state, federal, etc.)                                                    | 120                         | 47.1 | 71                             | 48.6         | 46                    | 44.7        | 34                            | 45.3        | 73                 | 45.6        | 23                          | 44.2        | 95                      | 47.3        |
| 30. Access to research updates <sup>c</sup>                                                                                  | 206                         | 79.5 | 118                            | 81.9         | 84                    | 76.4        | 60                            | 80.0        | 129                | 78.7        | <b>35</b>                   | <b>66.0</b> | <b>170</b>              | <b>83.3</b> |
| 31. Access to research participation                                                                                         | 155                         | 60.8 | 85                             | 59.0         | 67                    | 63.2        | 43                            | 58.9        | 99                 | 61.5        | 28                          | 53.9        | 127                     | 63.2        |
| 32. Information about jobs/future planning for the male with DBMD                                                            | 58                          | 29.7 | 40                             | 32.8         | 16                    | 23.5        | 16                            | 29.6        | 38                 | 30.7        | 14                          | 33.3        | 43                      | 28.5        |
| 33. Information about transitioning to independent adult life                                                                | 55                          | 32.5 | 39                             | 34.8         | 14                    | 25.9        | 16                            | 34.0        | 33                 | 30.6        | 13                          | 32.5        | 41                      | 32.0        |
| 34. Information about how to prepare advance directives: living wills & designating durable power of attorney for healthcare | 93                          | 45.4 | 65                             | 48.5         | 26                    | 38.8        | 22                            | 36.1        | 63                 | 49.6        | 17                          | 39.5        | 75                      | 46.6        |
| <b>Psychosocial Issues for Patient with DBMD</b>                                                                             |                             |      |                                |              |                       |             |                               |             |                    |             |                             |             |                         |             |

**Supplementary Table S3. Frequency distributions and chi-square tests for management of needs by ambulation status, household income and race/ethnicity.**

|                                                                                                   |     |      |           |             |           |             |           |             |            |             |    |      |     |      |
|---------------------------------------------------------------------------------------------------|-----|------|-----------|-------------|-----------|-------------|-----------|-------------|------------|-------------|----|------|-----|------|
| 35. Advocating at the school or the workplace                                                     | 167 | 78.8 | 93        | 80.2        | 69        | 75.8        | 46        | 75.4        | 108        | 80.0        | 32 | 78.1 | 134 | 78.8 |
| 36. Patient discussion/support groups <sup>b</sup>                                                | 111 | 51.9 | 60        | 49.6        | 47        | 54.0        | <b>25</b> | <b>39.7</b> | <b>77</b>  | <b>57.5</b> | 19 | 43.2 | 90  | 53.6 |
| 37. Counseling to help emotional adjustment (depression, fear, loneliness, etc.)                  | 99  | 49.3 | 56        | 48.7        | 40        | 49.4        | 21        | 38.9        | 70         | 54.3        | 17 | 42.5 | 82  | 51.6 |
| 38. Making & maintaining age-appropriate friendships <sup>a</sup>                                 | 159 | 68.2 | <b>87</b> | <b>62.1</b> | <b>69</b> | <b>76.7</b> | 46        | 69.7        | 102        | 68.9        | 36 | 72.0 | 122 | 67.0 |
| 39. Suggestions for recreational activities alone or with family and friends                      | 159 | 67.7 | 87        | 63.0        | 66        | 72.5        | 48        | 69.6        | 99         | 67.4        | 35 | 70.0 | 122 | 66.7 |
| <b>Psychosocial Issues for Parent/Caregivers &amp; Family</b>                                     |     |      |           |             |           |             |           |             |            |             |    |      |     |      |
| 40. Balancing work, family & caregiving                                                           | 179 | 73.1 | 102       | 70.3        | 73        | 77.7        | 49        | 70.0        | 114        | 73.6        | 40 | 75.5 | 137 | 72.1 |
| 41. Finding time and energy for yourself (personal time for the caregiver) <sup>a,b</sup>         | 148 | 61.4 | <b>78</b> | <b>54.6</b> | <b>67</b> | <b>72.8</b> | <b>34</b> | <b>50.0</b> | <b>100</b> | <b>65.4</b> | 33 | 64.7 | 114 | 60.6 |
| 42. Finding time and energy for adult relationships (spouse or significant others) <sup>a,b</sup> | 144 | 60.5 | <b>73</b> | <b>52.1</b> | <b>67</b> | <b>72.8</b> | <b>30</b> | <b>45.5</b> | <b>99</b>  | <b>65.1</b> | 30 | 62.5 | 113 | 60.1 |
| 43. Arranging child care for a child with disability (for parents to work) <sup>a</sup>           | 104 | 63.4 | <b>58</b> | <b>56.3</b> | <b>44</b> | <b>78.6</b> | 29        | 58.0        | 67         | 65.1        | 26 | 66.7 | 77  | 62.6 |
| 44. Finding funding and available respite care so caregivers can be gone                          | 99  | 52.1 | 64        | 49.2        | 32        | 58.2        | 28        | 50.0        | 66         | 55.5        | 24 | 52.2 | 75  | 52.8 |
| 45. Finding or attending parent, spouse or sibling support groups <sup>b</sup>                    | 96  | 46.8 | 53        | 43.8        | 38        | 48.7        | <b>17</b> | <b>32.1</b> | <b>68</b>  | <b>51.1</b> | 21 | 45.7 | 74  | 47.1 |
| 46. Arranging or getting access to marriage or relationship counseling <sup>b</sup>               | 51  | 41.1 | 28        | 37.3        | 21        | 46.7        | <b>8</b>  | <b>22.9</b> | <b>39</b>  | <b>50.0</b> | 10 | 37.0 | 40  | 41.7 |
| 47. Counseling to help emotional adjustment (depression, fear, loneliness, etc.)                  | 71  | 40.1 | 43        | 39.8        | 28        | 42.4        | 18        | 35.3        | 47         | 42.0        | 14 | 38.9 | 57  | 40.7 |
| 48. Finding appropriate discipline techniques for the child with DBMD                             | 103 | 58.5 | 57        | 62.6        | 45        | 56.3        | 26        | 52.0        | 70         | 60.9        | 18 | 48.7 | 85  | 61.2 |

Hawaii excluded. Bolded numbers are significantly different.

<sup>a</sup>Chi-square for ambulation status statistically significant ( $p < .05$ ). <sup>b</sup>Chi-square for household income statistically significant ( $p < .05$ ). <sup>c</sup>Chi-square for race/ethnicity statistically significant ( $p < .05$ ).

\*Counts for managed items varies depending on reported need by caregiver.
